# Supplementary material for: Impact of three weeks of integrative neuromuscular training on the athletic performance of elite female boxers
Source: PeerJ journal article supplement (doi:10.7717/peerj.18311), 2024-10-30
Supplement: Test_data.zip [file Test_data.zip]

## Sheet: second test
	Straight punch(kw)					Hooks punch(kw)					Uppercuts punch(kw)					Continuous punching(kw)
Number	Lead	Change	Rear	Change(%)		Lead	Change(%)	Rear	Change(%)		Lead	Change(%)	Rear	Change(%)		10-second continuous punching	Change(%)	30-second continuous punching	Change(%)	3-minute continuous punching	Change(%)
1	13.171	8.22	18.177	28.21		14.68	15.77	18.1	19.87		24.0488	30	32.0843	45.29		756.258	65.75	1862.75	60.2	3845.88	8.77
2	25.9067	11.78	25.1965	51.81		24.14	27.19	31.83	-0.81		23.3436	36.01	23.9788	85.89		773.569	60.29	1846.09	39.54	4324.16	30.13
3	23.9	104.97	19.4719	-13.47		19.5	41.2	33.5	52.07		18.341	26.48	19.1536	17.48		467.014	-24.76	2089.85	47.32	4059.14	4.59
4	20	5.21	16.855	23.97		14.3	37.1	37.2	168.2		10.7694	3.56	10.8369	-52.46		463.499	-8.95	1274.21	6.46	4632.15	24.52
5	14	-3.71	24.0775	88.12		19	2.65	16.3	-25.33		16.3576	23.94	11.1121	14.54		576.298	39.25	1122.39	-9.62	4351.32	-4.86
6	19.3	2.66	29.6965	42.11		24.1	2.34	16.9	-48		19.6217	14.74	29.8716	207.94		567.837	-5.44	1344.36	7.74	4695.41	28.5
7	18.3	0	23.9	26.46		18.1	19.87	23.9	9.13		18.1	63.06	19.7	43.8		610.52	12.33	1347.79	17.42	4254.08	27.17
8	19.6	11.36	24	71.43		29	0	14.6	-40.65		23.8	26.6	25.6	64.1		534.67	23.01	1435.98	26.41	4563.65	15.14
9	21.8	106.24	24.3438	69.74		30.2	229.33	19.02	-34.46		9.15791	-37.26	22.4221	36.54		1071.55	87.48	2102.74	90.68	4735.93	26.77
10	13.1	-39.99	26.4174	38.32		15.7	-19.49	38.2	29.45		17.8051	3.55	38.1627	37.76		867.548	26.44	2057	63.84	5236.37	11.11
11	19.8	18	23.3196	36.37		14.2	-30.63	23.01	-28		23.0879	86.21	18.2087	-20.86		838.005	55.01	2136.04	48.93	5317.67	42.4
12	16.7	8.44	18.6462	39.18		18.2	8.2	33.9	10.68		11.2727	13.84	14.4385	36.23		761.167	35.6	2025.57	54.81	4332.61	74.98
13	9.6	-45.73	28.0129	49.79		22	51.62	42.4	54.52		13.8993	15.83	30.048	110.14		971.83	79.01	1626.61	33.67	4845.52	49.32
14	16.4	5.26	14.5061	-24.03		23.8	71.35	38.8	56.7		10.8635	-55.85	10.3969	-63.89		742.879	22.71	1149.17	-34.91	5475.86	-9.29
15	15.5	31.24	17.9549	-5.03		25.3	65.04	41.2	36.88		11.2216	-52.86	28.2599	-25.44		583.481	70.75	1376.17	14.55	4826.25	2.66
16	16.2	-27.32	28.2788	8.35		16.2	-41.71	41.2	26.57		21.5067	13.81	24.4501	-29.13		798.926	52.92	1998.36	86.72	5476.18	10.39
17	16.7	-10.5	24.4811	20		23.7	48.96	41.7	38.13		15.3563	11.3	19.3231	-37.27		693.697	10.4	1624.81	2.43	5005.8	11.54
18	13.6	-11.57	22.0452	-10.37		15.5	-0.9	29	-25.08		20.8717	19.26	23.1965	48.05		480.087	36.79	1072.14	1.05	5051.2	13.03
19	14.5	-13.07	18.1715	10.12		17.2	-30.22	35.9	-6.97		16.3639	-4.88	26.7117	-28.96		904.533	89.57	1982.35	28.13	4002.92	-11.88
20	14	-42.65	24.9787	13.55		13.3	-36.36	38.3	18.76		26.35	33.08	23.7702	56.38		696.96	49.86	1622.8	29.03	5119.9	2.95
21	14.3	-7.56	20.3994	0		27.4	32.95	42.2	105.45		15.4156	-36.8	15.6421	-61.19		607.109	39.35	1306.22	27.66	5236.92	6.48
22	12.8	-11.78	14.9277	-7.84		16.2	24.9	17	6.45		11.7567	18.79	18.2666	12.78		643.74	-11.81	1307.97	-12.82	4266.16	15.37
23	13.1	-39.96	34.2302	52.13		10.4	-62.95	10.9	-74.29		13.1989	26.92	38.3134	268.37		647.532	-1.11	1518.35	20.11	4737.58	14.23
24	10.3	-34.1	21.7393	12.64		13.8	-32.62	20.1	8.65		20.3616	19.06	19.6491	25.4		761.438	105.81	1851.38	57.11	5937.7	52.51
25	24.5	46.01	23.2278	37.46		12.3	-26.96	16.6	-29.39		18.539	50.73	28.1157	128.62		761.641	68.73	1807.37	9.92	5440.12	27.26
26	25.9	23.04	29.2179	20.25		24.1	1.43	19.6	-36.75		23.2278	28.34	19.1996	2.67		692.915	27.43	1762.08	37.46	4660.07	9.31
27	14.3	7.84	16.3555	-17.79		19.67	3.8	29.5	34.52		14.0013	8.53	20.2616	104.65		701.401	20.48	1333.51	-5.74	6012.59	50.06
28	19.6	-4.39	26.9658	-3.33		12.7	-23.45	33.7	13.97		15.7744	24.17	24.7585	57.71		975.616	64.91	2341.56	49.61	6108.46	52.15
29	23	27.78	29.5	15.69		17.5	-36.36	28.8	-6.49		20.3	5.18	25.5	0		896.301	28.72	2640.29	60.96	6244.7	47.12
30	24.427	69.3	23.2874	4.49		16.55	-10.78	39.53	-20.19		17.6957	12.74	36.0265	38.42		986.939	43.67	2559.89	64.11	6586.44	17.9
31	22.4	42.95	18.0927	-39.5		24.6	94.31	26.8	43.55		12.7826	-37.66	13.6589	-34.95		864.047	39.21	1627.74	12.3	6535.35	54.77
32	25.9	57.06	17.7559	-48.22		29.5	85.53	27	-7.85		15.115	-31.27	19.5834	21.61		510.737	-30.01	1508.16	-8.47	4457.33	5.46
33	17.2	2.5	18.8036	-16.07		24.5	74.88	48.1	62.66		10.885	-28.89	21.0217	50.14		767.848	50.84	1778.95	48.64	6616.16	4.75
34	21.1	10.07	21.702	-27.91		35.8	43.6	35.3	17.94		15.1499	-21.09	35.2881	74.7		1022.2	46.1	2213.99	15.07	6704.86	0.75
35	19	22.58	22.0339	-15.92		17.2	7.03	40.5	36.04		22.3647	20.22	24.4616	-22.1		669.497	-9.83	1370.18	-19.95	6729.98	3.9
36	24.2	36.18	19.0639	-13.76		19.2	-27.13	23.2	-20.82		19.4183	10.97	16.1798	-20.3		978.222	55.41	1934.57	25.69	5687.81	6.99
37	24.6	55.21	23.5924	-13.91		26.3	26.26	43.1	31.08		18.9775	-19.92	24.6714	-49.03		1005.31	28.01	2061.65	9.13	5746.68	5.67
